1 **Different intervention strategies toward live poultry markets against**  
2 **avian influenza A (H7N9) virus: model-based assessment**

3  
4 Guanghu Zhu<sup>1,2,3†</sup>, Min Kang<sup>4,†</sup>, Xueli Wei<sup>1</sup>, Tian Tang<sup>2</sup>, Tao Liu<sup>3</sup>, Jianpeng Xiao<sup>3</sup>, Tie  
5 Song<sup>4,\*</sup>, and Wenjun Ma<sup>3,\*</sup>

6 <sup>1</sup>School of Mathematics and Computing Science, Guilin University of Electronic  
7 Technology, Guilin, 541004, China

8 <sup>2</sup>Guangxi Key Laboratory of Cryptography and Information Security, Guilin  
9 University of Electronic Technology, Guilin, 541004, China

10 <sup>3</sup>Guangdong Provincial Institute of Public Health, Guangdong Provincial Center for  
11 Disease Control and Prevention, Guangzhou, 511430, China

12 <sup>4</sup>Guangdong Provincial Center for Disease Control and Prevention, Guangzhou,  
13 511430, China

14

15 \* Corresponding author

16 E-mail address: [Tsong@cdcp.org.cn](mailto:Tsong@cdcp.org.cn) (Tie Song),

17 [mawj@gdiph.org.cn](mailto:mawj@gdiph.org.cn) (Wenjun Ma)

18

19 <sup>†</sup> These authors contributed equally to this work.

20

21

## 22 **Abstract**

23 **Background:** Different interventions targeting live poultry markets (LPMs) have  
24 been applied in China for controlling the avian influenza A (H7N9), including LPM  
25 closure and “1110” policy (i.e., daily cleaning, weekly disinfection, monthly rest day,  
26 zero poultry stock overnight). However, the effects of these interventions have not  
27 been comprehensively assessed.

28 **Methods:** Based on the available data (including reported cases, domestic poultry  
29 volume, and climate) collected in Guangdong Province between October 2013 and  
30 June 2017, we developed a new compartmental model that enabled us to infer H7N9  
31 transmission dynamics. The proposed model incorporated the intrinsic interplay  
32 among humans and poultry as well as the effects of absolute humidity and LPM  
33 intervention, in which different intervention strategies were parameterized and  
34 estimated by Markov chain Monte Carlo (MCMC) method.

35 **Results:** There were 258 confirmed human H7N9 cases in Guangdong Province  
36 during the study period. If without interventions, the number would reach 646 (95%CI,  
37 575-718) cases. The temporal, seasonal and permanent closures of LPMs can  
38 substantially reduce transmission risk, which might respectively reduce human  
39 infections by 67.2% (95%CI, 64.3%-70.1%), 75.6% (95%CI, 73.8%-77.5%), 86.6%  
40 (95%CI, 85.7-87.6%) in total four epidemic seasons, and 81.9% CI(95%,  
41 78.7%-85.2%), 91.5% (95%CI, 89.9%-93.1%), 99.0% (95%CI, 98.7%-99.3%) in the  
42 last two epidemic seasons. Moreover, implementing the “1110” policy from 2014 to  
43 2017 would reduce the cases by 34.1% (95%CI, 20.1%-48.0%), suggesting its limited  
44 role in preventing H7N9 transmission.

45 **Conclusions:** Our study quantified the effects of different interventions and execution  
46 time toward LPMs for controlling H7N9 transmission. The results highlighted the  
47 importance of closing LPMs during epidemic period, and supported permanent  
48 closure as a long-term plan.

49 **Keywords:** H7N9; live poultry market; transmission dynamics; 1110; intervention  
50 strategy

## 51 **Author summary**

52 Five waves of human influenza A (H7N9) epidemics affected China during 2013 and  
53 2017. Its continuous emergence poses a big threat to public health. Given the key role  
54 of live poultry markets (LPMs) in H7N9 transmission, different interventions in  
55 LPMs (including the “1110” policy and LPM closure) were widely employed to  
56 prevent human infection with H7N9. Providing scientific evidence of their long-term  
57 effects is very important for the disease control, which can help to maximize control  
58 benefits and to minimize economic loss. To achieve this, we established a new  
59 transmission model and parameterized the intervention strategies. By using the  
60 proposed model to investigate the recent H7N9 outbreak in Guangdong Province, we  
61 quantified the effects of temporal, seasonal and permanent PLM closures, and the  
62 “1110” policy, as well as different intervention timing on the emergence of human  
63 H7N9 infections. The results can offer useful information for local authorities to take  
64 proper management in LPMs, and help in preparing optimal control strategies.

## 65 **Introduction**

66 A novel reassortant avian influenza A (H7N9) virus, characterized by severe  
67 pneumonia, acute respiratory distress syndrome, and high mortality rate [1], was first  
68 identified in east China in March 2013 [2]. Since then, human cases of H7N9  
69 infection have periodically occurred in China, with a larger fifth epidemic wave  
70 during the winter and spring of 2016/17. As of June 2017, a total of 1533 human  
71 infections with 592 deaths have been reported to the WHO [3]. The continuous  
72 emergence of avian influenza A (H7N9) virus poses a big challenge to public health in  
73 China and around the world.

74 Epidemiological surveys showed that human H7N9 infections were associated with  
75 the exposure to live poultry or potentially contaminated environments, which was  
76 usually located in live poultry markets (LPMs) [4-10]. Further studies found that  
77 LPMs would support the maintenance, amplification and dissemination of avian

78 influenza virus (AIV) [5-7, 11, 12], as different types of poultry and birds (such as  
79 chicken, ducks, pigeon, quail) are placed densely in LPMs and some of them are  
80 casually slaughtered there [13]. Under this circumstance, many environmental  
81 samples collected from LPMs were observed to be positive for H7N9 [6, 7, 11, 14],  
82 and strong positive association was found between H7N9 presence and local density  
83 of LPMs in China [9, 15]. Moreover, LPMs are very common in China. A survey  
84 conducted in Guangzhou in 2014 showed that 68% of families visited LPMs once a  
85 week even during the H7N9 epidemic period [14]. LPMs therefore played an  
86 important role in the H7N9 transmission in China [16-19].

87 Given the critical role of LPMs, interventions targeting them have become the most  
88 frequently adopted measures in response to H7N9 outbreak. The usually implemented  
89 interventions include routine intervention and LPM closure. Routine intervention  
90 emphasizes on cleaning and disinfecting LPMs. The representative one is the “1110”  
91 policy (i.e., daily cleaning, weekly disinfection, monthly rest day, zero poultry stock  
92 overnight), which has been carried out in Guangdong Province since 2015. According  
93 to the closing duration, LPM closures can be divided into three types: temporary,  
94 seasonal, and permanent closure. These strategies are widely employed in different  
95 regions. For example, LPMs in Yangtze River Delta were closed after the emergency  
96 of human H7N9 cases and were reopened when no case was reported [20, 21]. LPMs  
97 in Shanghai were closed from the dates of the Chinese New Year to April since 2014.  
98 These two operations are typical prototypes of temporary and seasonal closure.  
99 Permanent closure of LPMs is usually implemented in some developed regions, such  
100 as Singapore. To effectively and efficiently control the spread of H7N9 virus, an  
101 urgent and essential task is to quantify these interventions’ effects.

102 Through statistical models and epidemiological surveys, a few studies have  
103 investigated the potential association of LPMs closure with the reduction of  
104 AIV-isolation rates and H7N9-incidence in humans [16, 17, 20, 22-26]. Previous  
105 studies indicated that the adopted interventions (temporary closure) in different cities  
106 of China can reduce the risk of human infections with different efficiency [20, 21, 25,

107 26]. Other studies found that temporary closure and disinfection of LPMs could  
108 reduce H7N9 virus contamination [14, 17, 23, 27], but not completely halted the  
109 persistence and dissemination of the virus, and long-term benefits were unremarkable  
110 [17, 23, 24]. Existing studies had several limitations that are worthy of further  
111 discussion: (i) These studies mainly focused on temporary LPM closure, but the  
112 “1110” policy were seldom evaluated; (ii) The study period of previous studies  
113 usually took up several months and it failed to infer the long-term effects of LPM  
114 interventions; and (iii) Seasonal factors (absolute humidity [AH] has been shown a  
115 strong negative correlation with the survival and transmission of influenza viruses  
116 [28-30]), were seldom incorporated into the modeling approach, which would  
117 influence the objectivity of assessment.

118 To fill the knowledge gaps, we conducted an empirical study by focusing the H7N9  
119 transmission in Guangdong Province, where H7N9 epidemics have periodically  
120 emerged in recent years. We established a new compartmental model to explore the  
121 transmission dynamics. The effects of the “1110” policy and LPMs closure were fitted  
122 by Markov chain Monte Carlo (MCMC) method. By performing numerical  
123 simulations from the proposed model with the parameterized interventions, we  
124 quantified their specific impacts on the epidemic evolution, and based on that we put  
125 forward some intervention strategies.

## 126 **Methods and materials**

### 127 **Study area**

128 Guangdong Province (20°13'N to 25°31'N and 109°39'E to 117°19'66 E) is located in  
129 southern China with the most population (over 107.24 million) in China. It has an area  
130 of 179,800 km<sup>2</sup>, which is administratively divided into 21 prefecture-level cities (see  
131 Fig 1). Guangdong has a humid subtropical climate, with short, mild, dry winters and  
132 long, hot, wet summers. People there have the habit of purchasing live poultry at  
133 LPMs. The province accounts for about 10% of domestic poultry (DP) industry and it

134 was regarded as an important epicenter of AIV circulation in China [13, 24].

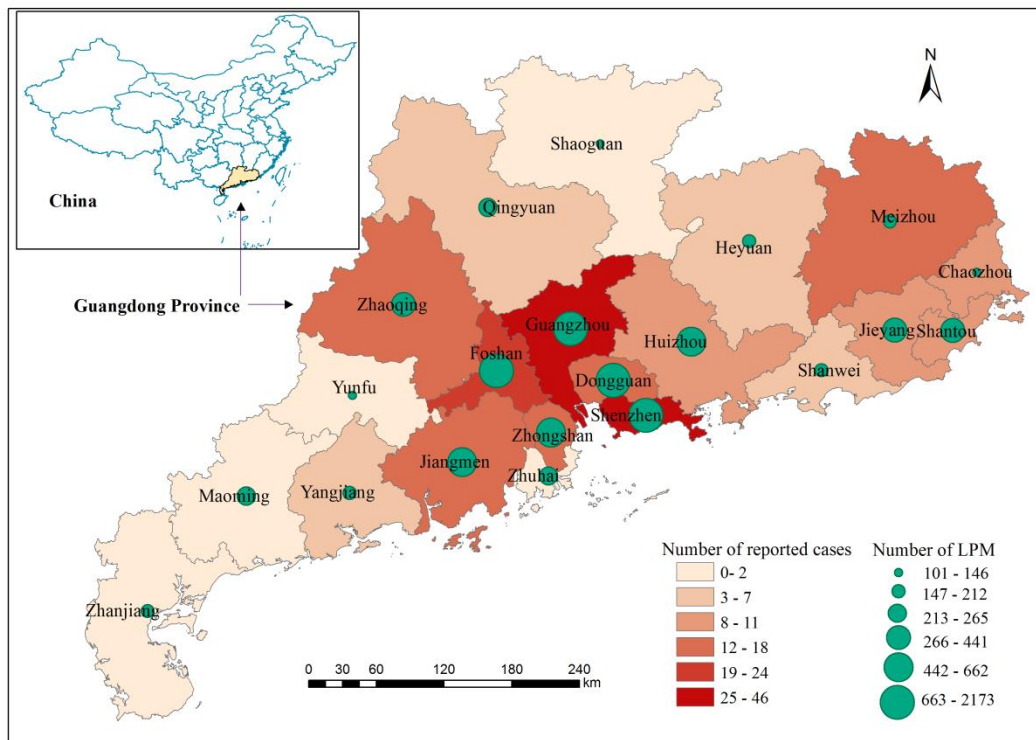

135

136 **Fig 1. The location of Guangdong Province in China, with the geographical**  
137 **distributions of reported H7N9 cases and live poultry markets (LPMs) in the 21**  
138 **prefecture-level cities.**

### 139 **Data collection**

140 The data of human H7N9 cases reported in Guangdong Province between October  
141 2013 and June 2017 was used in this study. Records of weekly cases were extracted  
142 from Guangdong Provincial Center for Disease Control and Prevention (GDCDC),  
143 which include the date of illness onset and the city he/she lives.

144 The intervention strategies under consideration include the “1110” policy and LPM  
145 closure. The former was adopted by the Guangdong government and was enforced  
146 through this province since January 2015. To quantify the LPM closure data, we first  
147 retrieved the distributions of LPMs in city level by searching them from Baidu map,  
148 and then collected the numbers of closed LPMs as well as the closing time and  
149 duration by browsing local government webs and media reports (such information

150 was documented by local government and delivered to the public by various media).

151 Based on that, we computed the proportions of the closed LPMs in each week.

152 Weekly data of average temperature and relative humidity were retrieved from  
153 Guangdong Meteorological Service (<http://www.grmc.gov.cn/>), which were used to  
154 calculate the absolute humidity (AH). The seasonal numbers of the DP marketing  
155 were downloaded from the agricultural statistics provided by Statistics Bureau of  
156 Guangdong Province (<http://www.gdstats.gov.cn/tjsj/ny/>). The data was used to  
157 estimate the weekly recruitment rate of DP, i.e., the variable  $A$  in model (1). The  
158 original data of AH and DP is periodic and discontinuous. To specify these data to  
159 each week, the time series of AH and DP were smoothed by Fourier functions before  
160 applying them into the proposed model (see Figs S1 and S2).

## 161 **Dynamic model**

162 Inspired by recently-developed mathematical models [31-35], we proposed a new  
163 compartmental model for simulating the H7N9 transmission dynamics among DP and  
164 humans, under the influence of LPMs closure and the “1110” policy as well as AH.  
165 Based on the compartmental principle and H7N9 epidemiology, we posed the  
166 following hypotheses.

- 167 ● The total number of DP ( $N_p$ ) is classified into two subclasses: the susceptible ( $S_p$ )  
168 and the infectious ( $I_p$ ); and the total number of humans ( $N_h$ ) is classified into four  
169 subclasses: the susceptible ( $S_h$ ), the exposed ( $E_h$ ), the infected ( $I_h$ ) and the  
170 recovered ( $R_h$ ).
- 171 ● The transmission process follows an SI-SEIR framework. Thereinto, susceptible  
172 humans and poultry can be infected with certain probability once interacting with  
173 infectious poultry. If infected, human individual becomes ill after passing through  
174 the incubation period until recovery or death, and poultry becomes infectious  
175 immediately until death.
- 176 ● The direct transmission among human beings is ignored, since there is no

177 evidence for human-to-human infection [13, 33]. It is further assumed that the  
 178 number of susceptible humans is static in each epidemic season (from October to  
 179 next September) but varies across different seasons. The specific values were  
 180 estimated by MCMC method.

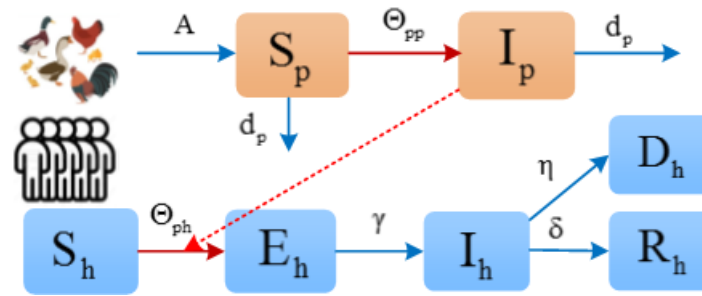

181

182 **Fig 2. Flow diagram on the dynamical transmission of H7N9 infection among**  
 183 **domestic poultry (DP) and humans.** The transmission follows an SI-SEIR approach,  
 184 where humans and poultry would be infected through direct/indirect interaction with  
 185 infectious poultry.

186 Accordingly, the dynamical transmission flowchart is shown in Fig 2, and the  
 187 corresponding model was formulated by the following ordinary differential equations.

$$\begin{cases} S'_p(t) = A(t) - \Theta_{pp}S_p - d_pS_p, \\ I'_p(t) = \Theta_{pp}S_p - d_pI_p, \\ S'_h(t) = \Theta_{ph}S_h, \\ E'_h(t) = \Theta_{ph}S_h - \gamma E_h, \\ I'_h(t) = \gamma E_h - (\eta + \delta)I_h, \\ R'_h(t) = \eta I_h. \end{cases} \quad (1)$$

188 The interpretations of the variables and parameters are presented in Table 1. Here  $\Theta_{pp}$   
 189 and  $\Theta_{ph}$  represent the forces of infection from infectious DP to susceptible DP and to  
 190 susceptible humans, respectively, given by:

$$\Theta_{pp} = \lambda_p \tilde{\phi}_p \tilde{\psi}_p f_1(H) \frac{I_p}{N_p}, \quad \Theta_{ph} = \lambda_h \tilde{\phi}_h \tilde{\psi}_h f_2(H) \frac{I_p}{N_p}.$$

191 The above expressions include three components: (i) baseline transmission rates  $\lambda_p$



192 and  $\lambda_h$ ; (ii) effects of intervention strategies (i.e., LPMs closure and “1110” policy),  
193 measured by  $\tilde{\phi}$  and  $\tilde{\psi}$ ; and (iii) seasonal influence, which is quantified by functions  
194 of AH, denoted by  $f_1$  and  $f_2$ .

195 Since AH is negatively associated with H7N9 infections [28-30], to precisely estimate  
196 the role of AH in infectivity, we provided different expressions of  $f_1$  and  $f_2$  as  
197 follows.

$$198 \quad f_i(H) = e^{-k_i H} \text{ or } f_i(H) = \frac{1}{1+e^{k_i H}} \text{ or } f_i(H) = \frac{k_i}{H} \text{ or } f_i(H) = \frac{1}{1+k_i H}.$$

199 The selection of  $f_1$  and  $f_2$  is based on their performance in model simulations.

200 Since LPMs closure and the “1110” policy would reduce the contact rates (between  
201 humans and poultry, and within poultry) and infection probability [20, 24], the roles  
202 of these interventions were quantified by modulating the infectivity. In view of the  
203 fact that such strategies can weaken the interactions among poultry but could not cut  
204 off all of their connections (poultry would not stay alone), we proposed the following  
205 formulas:

$$\tilde{\phi}_p = \frac{1}{1 + \kappa \phi_p},$$

206 in case of  $\kappa$  proportion of LPMs being closed, and

$$\tilde{\psi}_p = \begin{cases} 1, & \text{without the implement of the “1110” policy,} \\ \frac{1}{1 + \psi_p}, & \text{with the implement of the “1110” policy.} \end{cases}$$

207 Furthermore, considering that these two strategies can reduce the interactions between  
208 humans and poultry more directly and significantly, we proposed the following  
209 formulas:

$$\tilde{\phi}_h = \begin{cases} 1, & \text{without PLM closure,} \\ (1-\kappa)\phi_h, & \text{with } \kappa \text{ proportion of LPMs being closed;} \end{cases}$$

210 and

$$\tilde{\psi}_h = \begin{cases} 1, & \text{without the implement of the "1110" policy,} \\ \psi_h, & \text{with the implement of the "1110" policy.} \end{cases}$$

211 **Table 1: Description of parameters and variables in the model. The time unit is**  
 212 **per week.**

| Parameter   | Definition                                                        | Mean    | SD    | Reference |
|-------------|-------------------------------------------------------------------|---------|-------|-----------|
| $A(t)$      | Recruitment rate of domestic poultry                              | ---     | ---   | [a]       |
| $\lambda_h$ | Baseline transmission rate from poultry to humans                 | 0.679   | 0.008 | [b]       |
| $\lambda_p$ | Baseline transmission rate among poultry                          | 1.532   | 0.007 | [b]       |
| $\psi_p$    | Infectivity decrement among poultry due to "1110" policy          | 0.023   | 0.011 | [b]       |
| $\psi_h$    | Infectivity decrement from poultry to humans due to "1110" policy | 0.801   | 0.009 | [b]       |
| $\phi_p$    | Infectivity decrement among poultry due to LPM closure            | 0.240   | 0.010 | [b]       |
| $\phi_h$    | Infectivity decrement from poultry to humans due to LPM closure   | 0.602   | 0.008 | [b]       |
| $k_i$       | Amplitude of transmission rate due to AH change                   | 147-725 | 1-3   | [b]       |
| $d_p$       | Rate of screening and culling in poultry                          | 1/8     | ---   | [32]      |
| $\gamma$    | Reciprocal of the incubation period                               | 7/3.3   | ---   | [20, 32]  |
| $\eta$      | Disease-related death for humans                                  | 0.36    | ---   | [20, 32]  |
| $\delta$    | Recovery rate of infectious humans                                | 1       | ---   | [31]      |
| $H(t)$      | Absolute humidity (AH)                                            | ---     | ---   | [c]       |

[a]  $A(t)$  was estimated from the marketing rate of domestic poultry.

[b] Posterior means and posterior standard deviation (SD) of these parameters were estimated by MCMC method.

[c]  $H(t)$  was computed from the averager temperature and relative humidity.

### 213 **Inferring model parameters**

214 We adopted Metropolis-Hastings MCMC algorithm to estimate the parameters  
 215  $\Omega = (\lambda, \psi, \phi, k, S_h, I_p(0))$ , by fitting the cumulative number of reported cases to modeling  
 216 cases. Specifically, the relationship between reported case (I) and modeling cases (Y)  
 217 was written as  $Y = I + \varepsilon$ , where  $Y = (Y_1, Y_2, \dots, Y_T)$  and  $I = (I_1, I_2, \dots, I_T)$  are  
 218 T-dimensional vectors (T=196 is the study period). Each element in the random error  
 219 vector  $\varepsilon$  follows normal distribution with zero mean and variance given by  $\sigma^2$ . It is

220 noted that  $Y$  can be generated by running the model (1) with given initial condition  
221 and parameters. Thus, the likelihood function of the estimated parameters can be  
222 written as:

$$223 \quad P(Y|\Omega) = (2\pi)^{-\frac{T}{2}} \sigma^{-T} \exp \left[ tr \left( -\frac{(Y-I)'(Y-I)}{2\sigma} \right) \right], \quad (2)$$

224 The corresponding joint posterior distribution of the estimated parameters is given by

$$225 \quad P(\Omega|Y) = \prod_{t=1}^T P(Y_t|I_t, \Omega) P(I_t) P(\lambda) P(\psi) P(\phi) P(k) P(s_h) P(s_h). \quad (3)$$

226 The procedure of the MCMC algorithm is handled as follows [36, 37]: First, all  
227 independent parameters  $\Omega$  are initialized based on their prior information (following  
228 normal distributions). Second, the predictive cases are produced by solving the  
229 differential equations (1), and then the posterior distribution  $P(\Omega|Y)$  is estimated by  
230 the equation (3). For each iteration, new values of parameters  $\Omega^*$  will be generated  
231 according to the adaptive proposal distribution  $Q(\Omega^*|\Omega)$ , and will be accepted with  
232 probability

$$233 \quad \min \left( 1, \frac{P(\Omega^*|Y)Q(\Omega|\Omega^*)}{P(\Omega|Y)Q(\Omega^*|\Omega)} \right).$$

234 After a total of 20,000 iterations, the posterior distributions of the parameters are  
235 evaluated from the final 90% of the iterations.

236 To determine the most appropriate functional forms of  $f_1$  and  $f_2$ , we substituted  
237 eight combinations of them into the model, and fitted each case by MCMC method.  
238 The criterion of model selection is measured by fitting errors (i.e., the mean square  
239 error [MSE]) and the Akaike information criterion [AIC]). Here

$$240 \quad MSE = \frac{1}{T} \sum_{t=1}^T (Y_t - I_t)^2, \quad AIC = 2m - 2 \ln(L),$$

241 where  $m$  is the number of parameters and  $L$  is calculated by the equation (2).

## 242 **Uncertainty and sensitivity analyses**

243 To assess the uncertainty in model output that roots in model input (i.e., parameters  
244 and initial conditions for the model variable), we used a Latin hypercube sampling  
245 (LHS) [38]. To further assess how variations in outputs can be apportioned to different  
246 input sources, we conducted sensitivity analysis by evaluating partial rank correlation  
247 coefficients (PRCCs) for different input parameters against output variables over time  
248 [38]. We performed these analyses by using LHS with 1000 samples. Because no data  
249 is available for the distribution functions of the input parameters, we chose normal  
250 distributions for them with mean values and standard deviations given by Table 1. The  
251 absolute value of PRCC clarifies the correlation between input parameters and output  
252 variables. The value greater than 0.4, between 0.2 and 0.4, or between 0 and 0.2,  
253 separately illustrates that the correlation is important, moderate, or not significant.

## 254 **Numerical analysis**

255 For running the proposed model by ODE45 in Matlab, we presented the initial  
256 condition for the model as follows. The numbers of humans in exposed, infected and  
257 recovered states can be inferred from GDCDC, and the number of susceptible poultry  
258 was estimated from the marketing rate, which are  $E_h(0)=I_h(0)=R_h(0)=0$  and  $S_p$   
259  $=2,146,293$ . While the initial values of susceptible humans  $S_h(0)$  and infected poultry  
260  $I_p(0)$  were estimated by MCMC method.

261 To quantify the effects of different intervention strategies, we substituted the  
262 parameterized interventions into the model and performed a series of numerical  
263 simulations. The parameters vary according to the specific implementation of  
264 intervention at certain time. We first evaluated the influence of the adopted  
265 interventions, then checked the impacts of three types of closures as well as the “1110”  
266 policy, and finally assessed the intervention outcomes in case of different timing and  
267 duration. Here the duration of temporary, seasonal and permanent closure are assigned  
268 as from the following week of the first reported case to next January, from December

269 to next February, from October 2013 to June 2017, respectively. The reduction rate  $\rho$   
270 is calculated as  $\rho_i = 1 - \theta/\Phi$ , where  $\theta$  ( $\Phi$ ) is the number of human infections with  
271 (without) the implementation of intervention in the corresponding season.

## 272 Results

273 A total of 258 human H7N9 cases with 100 deaths were reported in Guangdong  
274 Province between October 2013 and June 2017, in which four epidemic waves  
275 separately recorded 109, 72, 14 and 63 cases. The time series of the confirmed cases  
276 and the LPM intervention information are illustrated in Fig 3. It was observed that the  
277 epidemic curves exhibited seasonal cycles, in which human infections usually  
278 occurred in the winter/spring and peaked in January. In response to local infection,  
279 LPM closure was implemented in many areas of Guangdong Province for varying  
280 duration. It was found that parts of LPMs were closed from January, and the  
281 proportion of closed LPMs reached a maximum during the festival of Chinese New  
282 Year. In addition, the “1110” policy was carried out simultaneously in Guangdong  
283 Province from January 15, 2015.

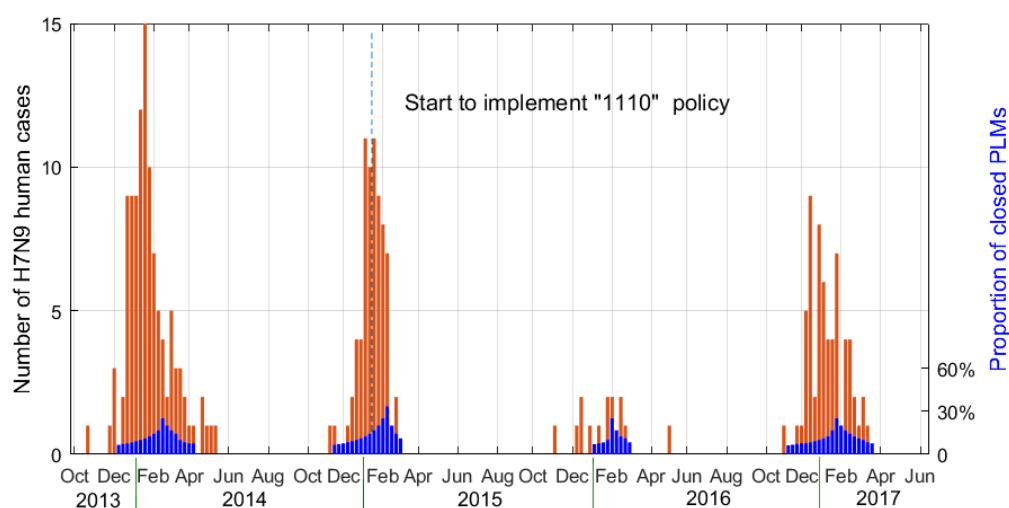

284  
285 **Fig 3. Weekly numbers of human infections with avian influenza A(H7N9) and**  
286 **the proportions of closed PLMs in Guangdong Province.** Guangdong experienced  
287 four H7N9 epidemic waves from October 2013 to June 2017.

288 The time series of AH and DP volume also exhibited clear seasonal patterns (see Figs

289 S1 and S2). As shown in Fig 4, regression analysis indicates that the onset of  
290 increased H7N9 incidence in Guangdong is associated with low AH levels and large  
291 DP volumes. Furthermore, the distributions of human infections in the 21 cities are in  
292 positive proportion to the numbers of LPMs, indicating the key role of LPMs in H7N9  
293 transmission.

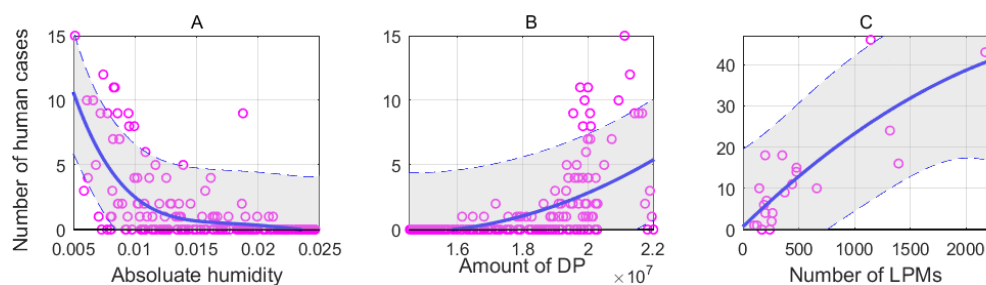

294

295 **Fig 4. The association between the number of reported human H7N9 cases and**  
296 **absolute humidity, as well as the amounts of domestic poultry (DP) and LPMs.**

297 The data corresponds to the study period in Guangdong Province, with the unit as per  
298 week in (A) and (B) and as per city in (C). The light shaded area is the 95%  
299 confidence interval (CI).

300 We checked the performances of the model with different quantification of seasonal  
301 effects and then selected  $f_1$  and  $f_2$  as

$$f_1 = \frac{1}{1 + r_i H}, f_2 = e^{-k_i H},$$

302 in that they yield the least values of MSE and AIC (see Table S1). In the following,  
303 we explored the outcomes of different interventions by applying the best-performance  
304 model to simulate H7N9 transmission dynamics.

305 The fitting results of weekly new cases and cumulative cases are shown in Fig S3.

306 The proposed model performed well in fitting data, which accounts for 99.6% and  
307 78.6% of variation in cumulative cases and weekly new cases, respectively (see Fig  
308 S4).

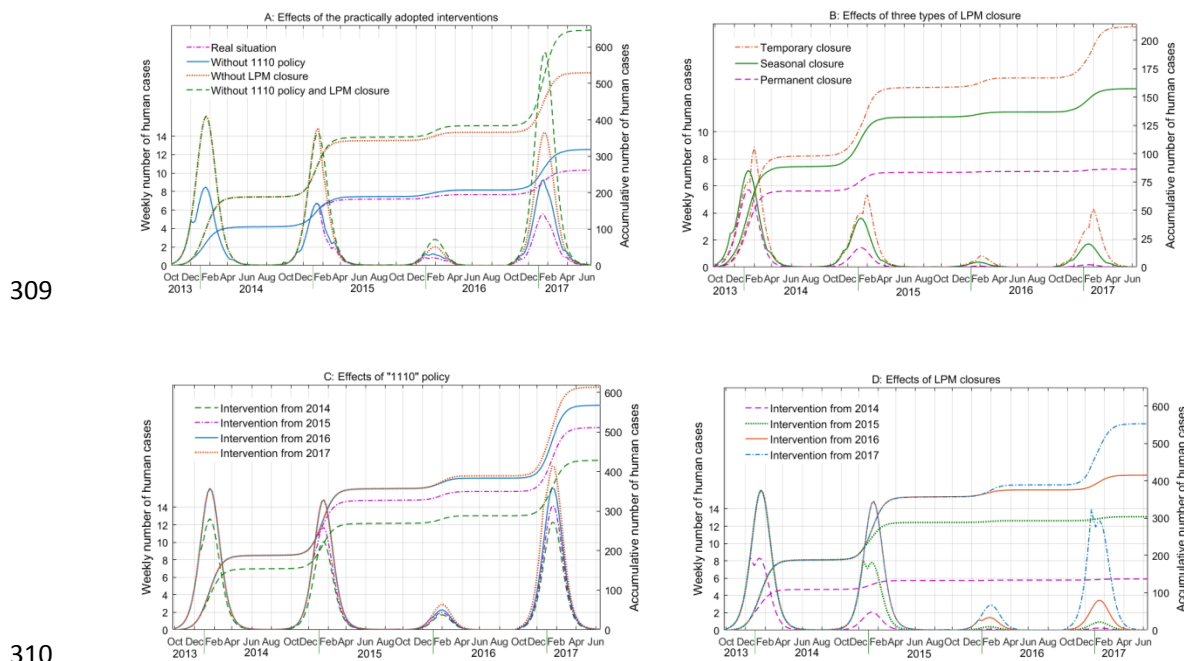

311 **Fig 5. Estimated weekly incidence of human H7N9 infections with different**  
312 **intervention strategies, by employing the model to Guangdong Province. The**  
313 **simulation results correspond to (A) the practically adopted strategies; (B) the three**  
314 **types of LPM closure; (C) the “1110” policy and (D) LPM closure.**

315 Fig 5 (A) shows the outcomes of the interventions that have already been adopted in  
316 Guangdong Province. The results indicate that during the study period if the “1110”  
317 policy had not been implemented in Guangdong, there would be 319 (95%CI,  
318 286-351) cases of human H7N9 infection, and if the LPM closure had not been  
319 implemented, there would be 529 (95%CI, 457- 602) cases. If both of these two kinds  
320 of interventions had not been implemented, the number would reach 646 (95%CI,  
321 575-718) and the transmission would possibly continue until May in each year. In this  
322 case, the numbers of cases in the four epidemic curves could be 189 (95%CI,  
323 183-195), 164 (95%CI, 151-176), 32 (95%CI, 27-36), and 265 (95%CI, 214-311),  
324 respectively. The simulation results show that the interventions adopted in Guangdong  
325 probably led to the reduction of human infection by 59.5% (95%CI, 48.5%-70.5%)  
326 and the prevention of 384 (95%CI, 313-456) cases.

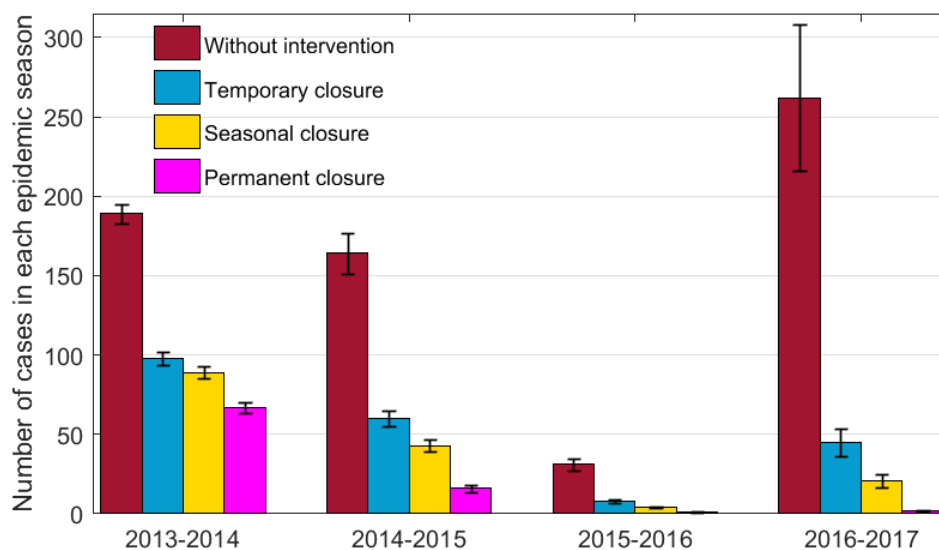

327

328 **Fig 6: Estimated prevalence of human H7N9 infections with different types of**  
329 **LPM closure.** The total numbers of human cases in each epidemic season with the 95%  
330 confidence intervals are shown.

331 Figs 5 (B) and 6 display the impacts of the temporary, seasonal and permanent  
332 closures on human infection of H7N9. It is found that the three types of closure could  
333 dramatically reduce the magnitude of infections and shorten the epidemic period.

334 Applying these strategies in Guangdong, numerical simulations show that the total  
335 number of human infections could be 212 (95%CI, 193-231), 157 (95%CI, 145-170)  
336 and 86 (95%CI, 80-93), which indicates 67.2%, 75.6% and 86.6% reductions in  
337 human infections, respectively. As shown in Fig 6, if temporary closure was  
338 implemented in the four epidemic seasons, there would be 48.0%, 63.2%, 74.3% and  
339 83.0% decrease in human infections, compared to the situation without intervention in  
340 each season. In case of seasonal closure, the reduction rates would be 52.9%, 73.8%,  
341 87.1%, 92.1%. These rates would be up to 64.6%, 90.2%, 96.8%, 99.2% for  
342 permanent closure, indicating its critical role in disease prevention. These data also  
343 indicate that if different LPM closure was implemented in four epidemic seasons, the  
344 control is more significant in the last seasons.



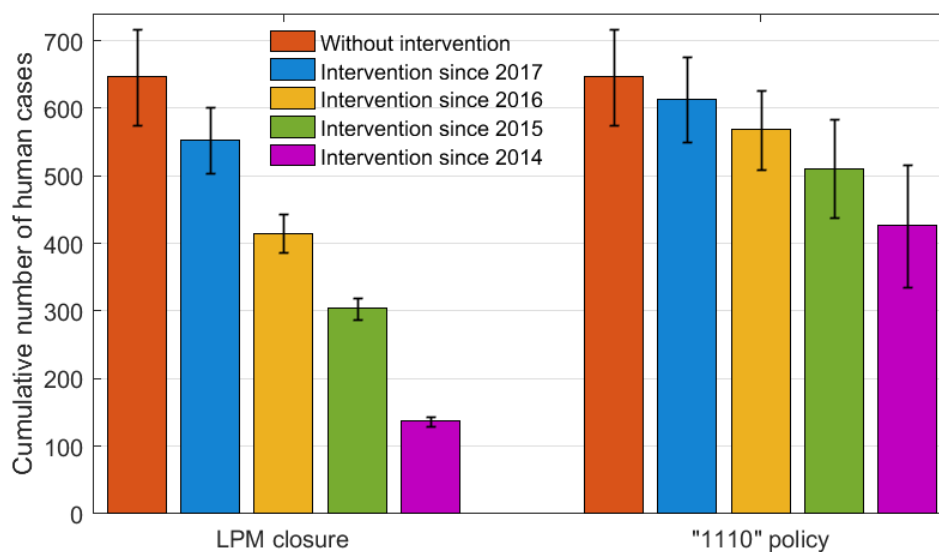

345

346 **Fig 7: Estimated prevalence of human H7N9 infections with intervention**

347 **beginning in different years.** The cumulative numbers of human cases during four  
348 epidemic seasons with the 95% confidence intervals are shown.

349 Figs 5 (C and D) and Fig 7 show the comparison results of LPM closure and "1110"

350 policy, as well as different start timings of interventions. It is found that these two

351 interventions played a role in controlling H7N9 transmission, but closing LPMs was

352 much more effective, which was associated with a sudden and sharp reduction in

353 incidence. While the "1110" policy worked slowly and gently, and it could not

354 eliminate infection risk in Guangdong. Moreover, the effects of interventions could be

355 more pronounced if they were carried out earlier during the past five years. For

356 example, if LPM closure or the "1110" policy were implemented since 2014, then 509

357 (95%CI, 502-516) or 220 (95%CI, 130-310) cases could be avoided. While if it was

358 implemented since 2017, only 93 (95%CI, 44-142) or 33 (95%CI, 0-104) cases could

359 be prevented.

360 Finally, we estimated the effects of interventions with different starting time and

361 duration. Some patterns are observed in Fig 8: (i) Disease incidence keeps decreasing

362 as prolonging the closure of LPMs, especially when the closure is between October

363 and next February; (ii) Closing LPMs during the emergence of human infection

364 always play a role in reducing the risk of infection, and the effects would be  
365 magnified if the “1110” policy is implemented in LPM-open days; (iii) For one  
366 month’s intervention, closing LPMs in every January receives the most benefits,  
367 which can reduce total infections by 41.1% (or 58.8%, with the combination of the  
368 “1110” policy); (iv) To most quickly achieve over 70% reduction in human infections,  
369 LPMs should be closed from early December to late February, and if combining the  
370 “1110” policy, this reduction rate could be above 75%; (v) Persistent intervention  
371 would bring much lower morbidity in latter epidemic seasons. For example, if LPMs  
372 were closed from November to next March in each year, there would be 79.5%  
373 (93.5%) reduction in human infections in the four (last two) epidemic seasons.

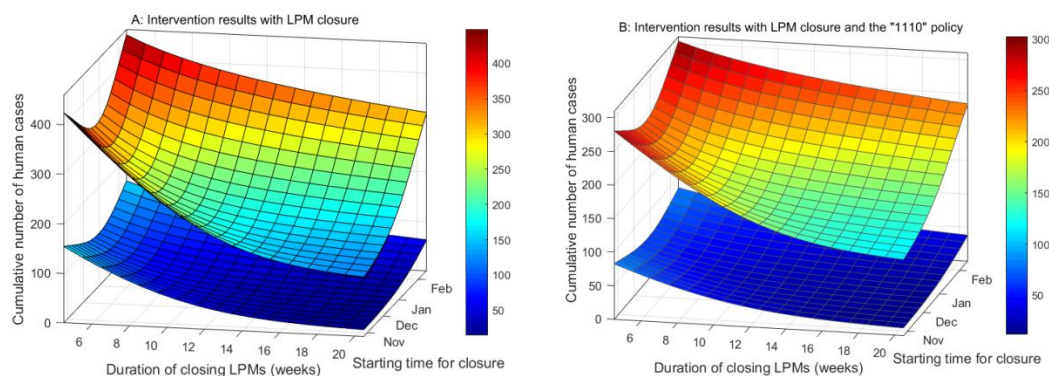

374

375 **Fig 8. Estimated prevalence of human H7N9 infections with different**  
376 **intervention timing.** The upper and lower curves are the numbers of human cases in  
377 the four epidemic seasons and in the last two epidemic seasons, respectively. The  
378 starting time of intervention varies from the last week of October to the second week  
379 of February. The duration of intervention varies from 5 weeks to 20 weeks.

380 Uncertainty and sensitivity analyses are shown in Figs 9, S5 and S6. Based on the  
381 absolute values of PRCC, the parameters that have strong influence in H7N9  
382 transmission are the baseline transmission rates ( $\lambda_p$  and  $\lambda_h$ ), intervention indicators  
383 ( $\phi_h$ ,  $\phi_p$ ,  $\psi_h$  and  $\psi_p$ ), and seasonal index ( $k_1$  and  $k_2$ ). While the initial condition  
384 of the model is not sensitive in determining the model outputs (Fig S6). It is observed  
385 that the significance of these parameters varies over time: (1) The parameters with

386 respect to the “1110” policy ( $\psi_h$  and  $\psi_p$ ) and LPMS closure ( $\phi_h$ ,  $\phi_p$ ) came into  
387 play only when they were implemented; (2) The baseline transmission rate from  
388 poultry to humans ( $\lambda_h$ ) and seasonal index become less and less correlated to the  
389 outputs; and (3) The baseline transmission rate among poultry ( $\lambda_p$ ) has consistent,  
390 major impact on the outputs.

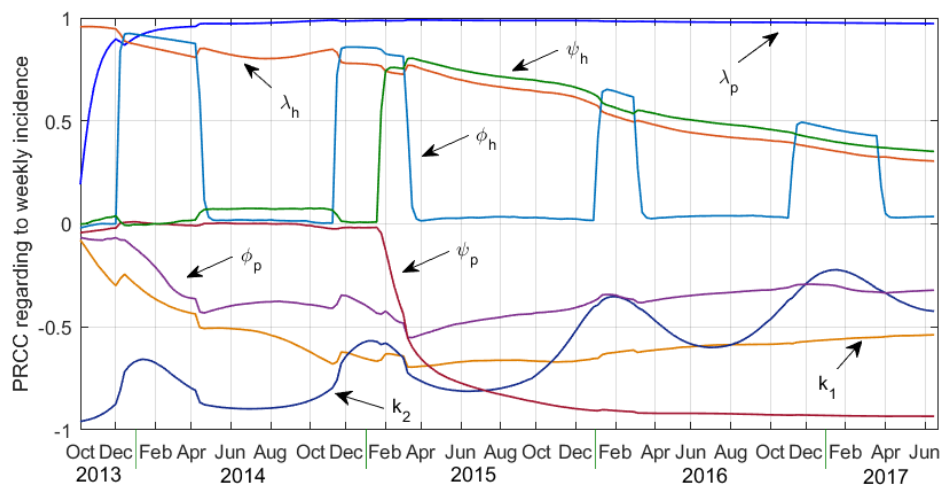

391

392 **Fig 9. Time-varying sensitivity of the number of new human cases to the model**  
393 **parameters as indicated by PRCC values.**

## 394 Discussion

395 The present study established a new mathematical model to systematically assess the  
396 effectiveness of LPM management on human H7N9 infections, by applying the model  
397 to the recent outbreak in Guangdong Province. The proposed model incorporates the  
398 pivotal dynamic elements accounting for interactions between/among poultry and  
399 humans, and virus evolution in these two populations, as well as seasonality effect.  
400 These elements were intrinsically coupled by an SI-SEIR framework. Two important  
401 insights arising from our results are significant for policymakers to improve  
402 prevention strategies.

403 First, our findings indicate that the “1110” policy can reduce the intensity of H7N9  
404 transmission, but it could not eliminate the risk of infection. Moreover, numerical

405 analyses suggest that only implementing the “1110” policy is not enough to prevent  
406 human infection, but combining it with LPM closure (implementing them at different  
407 time) can perform much better for the control. The moderate effects of the “1110”  
408 policy based on our study is inconsistent with the studies conducted in Hong Kong  
409 [39, 40], where they observed substantial reduction in virus isolation rates and human  
410 cases after implementing a ban on overnight poultry storage and one rest day per  
411 month [39, 40]. The possible reasons could be the incomplete implementation of this  
412 policy in Guangdong, where the situation is more complicated and multifactorial. For  
413 example, in response to banning live poultry overnight, some sellers just moved or  
414 hidden the live poultry around the markets. In this regard, the real effects of the “1110”  
415 policy might be underestimated in our study.

416 Second, our findings predict that LPM closure can dramatically diminish human  
417 infections. It was estimated that the adopted interventions played a role in preventing  
418 human H7N9 infection in Guangdong Province. If the LPM closure was implemented  
419 uniformly in a larger area and persisted for longer period, the control effects would be  
420 much more significant. By comparing the incidence before and after LPM closures,  
421 several studies have found that closing LPMs could reduce the incidence by 97-99%  
422 in Eastern China in 2013 [20], 97% in Guangdong and Zhejiang during 2013-14 [25],  
423 and 73-99% in Shanghai, Zhejiang, Jiangsu and Guangdong [26]. The present study  
424 went a step further to examine the long-term transmission dynamic and considered  
425 that the temporal, seasonal and permanent closures of LPMs can effectively reduce  
426 human infections. Moreover, our study suggest that seasonal closure is more effective  
427 than temporal closure in preventing H7N9 transmission, but permanent closure  
428 achieves the best effectiveness. Another important issue for intervention is execution  
429 time. Numerical analyses imply that closing LPMs during the occurrence of H7N9  
430 infection can maximize the efficiency of control. For example, closing LPMs from  
431 October 2013 to June 2017 or from December to March each year could result in 86.6%  
432 or 76.8% reduction in human infections, and these two reduction rates would be 99.1%  
433 and 92.8% in the last two epidemic season. Numerical results showed that the

434 intervention strategies performed better in latter epidemic seasons. The possible  
435 reason could be that (1) a large number of poultry had been infected before the  
436 occurrence of human infection in 2013, and it took time to wipe out the infection  
437 source; and (2) persistent intervention plays a more significant role in reducing the  
438 infection risk.

439 Our results highlight the importance of LPM closure in epidemic seasons, and support  
440 the decision of closing LPMs in risky areas for preventing further human infections.  
441 The findings are consistent with the observations in Shanghai and Singapore, where  
442 there has been no zoonotic avian in humans after the respective implementation of  
443 seasonal and permanent closures of LPMs, and also verify the result found in [21] that  
444 reopening LPMs in summer may not increase the risk of human infection with H7N9.

445 At present China, due to the traditional poultry production-supply-consumption chain,  
446 temporally closing LPMs is at cost of huge economic loss. A recent study estimated  
447 that the temporal LPM closures in Shanghai, Hangzhou, Huzhou and Nanjing in 2013  
448 cost the poultry industry about US\$ 8 billion [10]. To minimize economic loss and to  
449 reduce the risk of infection, uniformly implementing seasonal LPM closure conducted  
450 by local government seems to be a sustainable intervention strategy, especially closing  
451 LPMs in the epidemic period combined with routine intervention in non-epidemic  
452 period. Furthermore, permanent closure should be considered as a long-term plan in  
453 China, since it is the most effective strategy to control H7N9 infection based on our  
454 study. Implementing this strategy needs to modify/improve the current poultry trade  
455 and live poultry market system in China, such as developing poultry farms instead of  
456 backyard poultry production, slaughtering and packaging poultry centrally in  
457 specialized factories, and selling frozen poultry instead of live poultry. These moves  
458 require combined efforts from the government and society, such as changing the  
459 cuisine culture away from preferring live poultry.

460 Several limitations exist in our study: (i) The proportion of closed LPMs in each week  
461 was estimated by the numbers of closed LPMs and the closing time, but the difference

462 (e.g., scale, capacity) between these LPMs was not taken into account. (ii) The  
463 interventions were quantified by model parameters, the impact of which may be  
464 underestimated, given that the intervention in LPMs may not be implemented  
465 completely and effectively; (iii) The proposed model took into account the dominated  
466 routes for AIV transmission (including poultry-to-poultry and poultry-to-human  
467 transmission), but it did not incorporate the role of birds, which could be a potential  
468 factor that contributes to the spatial diffusion of AIV [33, 41]; (iv) Our analysis was  
469 based on a deterministic model with the potential effects of seasonality, which can  
470 captures the internal transmission mechanism and general trend of H7N9 infection,  
471 but it did not include the influence of random factors, such as environmental change  
472 or individual differences, and the results may contain certain uncertainties due to the  
473 data availability and model technology; (v) The temporal dynamics of AIV  
474 transmission under the influence of intervention was explored by the proposed model,  
475 but the model was unable to take into account the spatial heterogeneity and clustering  
476 of human infection, given the small number of cases and their sparse distributions in  
477 Guangdong Province; (vi) The impacts of vaccination was not considered here, which  
478 has dramatically reduced human infections since the use of vaccination in the second  
479 half of 2017.

## 480 **Conclusion**

481 We have quantified the effects of different interventions and execution time toward  
482 LPMs for the prevention of human H7N9 infections by analyzing the transmission  
483 dynamics with a new and robust mathematical model. Based on the model simulation,  
484 we believe that the closures of LPMs (especially permanent closure) are highly  
485 effective in preventing H7N9 virus infections in humans, and emphasize the  
486 importance of closing LPMs from December to March in Guangdong Province. We  
487 further reckon that only implementing “1110” policy is unlikely to stop H7N9  
488 transmission, and it should be combined with LPM closure in LPM-open days. The  
489 obtained results may provide useful information for local authorities to take proper

490 management for LPMs, and help in preparing an optimal control strategy.

491

492 **Acknowledgments**

493 This work was jointly supported by the National Natural Science Foundation of China

494 (11661026), and Science and Technology Program of Guangzhou (201804010383).

495

496

## 497 Reference

- 498 1. Gao, H., et al., *Clinical Findings in 111 Cases of Influenza A (H7N9) Virus Infection*. The New  
499 England Journal of Medicine, 2013. **368**(24): p. 2277-2285.
- 500 2. Gao, R., et al., *Human Infection with a Novel Avian-Origin Influenza A (H7N9) Virus*. The New  
501 England Journal of Medicine, 2013. **368**(20): p. 1888-1897.
- 502 3. WHO, *Influenza at the human-animal interface Summary and assessment*. 2017.
- 503 4. Zhou, X., et al., *The role of live poultry movement and live bird market biosecurity in the  
504 epidemiology of influenza A (H7N9): A cross-sectional observational study in four eastern  
505 China provinces*. Journal of Infection, 2015. **71**(4): p. 470-479.
- 506 5. Chen, L., et al., *Diversity and evolution of avian influenza viruses in live poultry markets,  
507 free-range poultry and wild wetland birds in China*. Journal of General Virology, 2016. **97**(4): p.  
508 844-854.
- 509 6. Chen, Y., et al., *Human infections with the emerging avian influenza A H7N9 virus from wet  
510 market poultry: clinical analysis and characterisation of viral genome*. The Lancet, 2013.  
511 **381**(9881): p. 1916-1925.
- 512 7. Bao, C., et al., *Live-Animal Markets and Influenza A (H7N9) Virus Infection*. The New England  
513 Journal of Medicine, 2013. **368**(24): p. 2337-2339.
- 514 8. Li, Q., et al., *Epidemiology of Human Infections with Avian Influenza A(H7N9) Virus in China*.  
515 The New England Journal of Medicine, 2014. **370**(6): p. 520-532.
- 516 9. Han, J., et al., *Epidemiological link between exposure to poultry and all influenza A(H7N9)  
517 confirmed cases in Huzhou city, China, March to May 2013*. Eurosurveillance, 2013. **18**(20).
- 518 10. Wu, Y. and G.F. Gao, *Lessons learnt from the human infections of avian-origin influenza A  
519 H7N9 virus: Live free markets and human health*. Science China-life Sciences, 2013. **56**(6): p.  
520 493-494.
- 521 11. Peiris, M. and H.L. Yen, *Animal and human influenzas*. Revue Scientifique Et Technique De L  
522 Office International Des Epizooties, 2014. **33**(2): p. 539.
- 523 12. Sims, L.D. and M. Peiris, *One health: the Hong Kong experience with avian influenza*. Current  
524 Topics in Microbiology and Immunology, 2012. **365**: p. 281-298.
- 525 13. Zhou, P., et al., *Avian influenza A(H7N9) virus and mixed live poultry-animal markets in  
526 Guangdong province: a perfect storm in the making?* Emerging Microbes & Infections, 2015.  
527 **4**(10): p. e63.
- 528 14. Kang, M., et al., *Environmental Sampling for Avian Influenza A(H7N9) in Live-Poultry Markets  
529 in Guangdong, China*. PLOS ONE, 2015. **10**(5).
- 530 15. Gilbert, M., et al., *Predicting the risk of avian influenza A H7N9 infection in live-poultry  
531 markets across Asia*. Nature Communications, 2014. **5**: p. 4116-4116.
- 532 16. Fournie, G. and D.U. Pfeiffer, *Can closure of live poultry markets halt the spread of H7N9*. The  
533 Lancet, 2014. **383**(9916): p. 496-497.
- 534 17. Offeddu, V., B.J. Cowling, and J.S.M. Peiris, *Interventions in live poultry markets for the control  
535 of avian influenza: A systematic review*. One Health, 2016. **2**(C): p. 55-64.
- 536 18. Lam, T.T., et al., *The genesis and source of the H7N9 influenza viruses causing human  
537 infections in China*. Nature, 2013. **502**(7470): p. 241-244.
- 538 19. Su, S., et al., *Epidemiology, Evolution, and Pathogenesis of H7N9 Influenza Viruses in Five  
539 Epidemic Waves since 2013 in China*. Trends in Microbiology, 2017. **25**(9): p. 713.



- 540 20. Yu, H., et al., *Effect of closure of live poultry markets on poultry-to-person transmission of*  
541 *avian influenza A H7N9 virus: an ecological study*. The Lancet, 2014. **383**(9916): p. 541-548.
- 542 21. Jian, et al., *Effects of closing and reopening live poultry markets on the epidemic of human*  
543 *infection with avian influenza A virus*. Journal of Biomedical Research, 2016. **30**(2): p.  
544 112-119.
- 545 22. Peiris, J.S.M., et al., *Interventions to reduce zoonotic and pandemic risks from avian influenza*  
546 *in Asia*. Lancet Infectious Diseases, 2016. **16**(2): p. 252-258.
- 547 23. Wu, J., et al., *Effect of Live Poultry Market Interventions on Influenza A(H7N9) Virus,*  
548 *Guangdong, China*. Emerging Infectious Diseases, 2016. **22**(12): p. 2104-2112.
- 549 24. Yuan, J., et al., *Effect of Live Poultry Market Closure on Avian Influenza A(H7N9) Virus Activity*  
550 *in Guangzhou, China, 2014*. Emerging Infectious Diseases, 2015. **21**(10): p. 1784-1793.
- 551 25. Wu, P., et al., *Poultry Market Closures and Human Infection with Influenza A(H7N9) Virus,*  
552 *China, 2013–14*. Emerging Infectious Diseases, 2014. **20**(11): p. 1891-1894.
- 553 26. Kucharski, A., et al., *Transmission Potential of Influenza A(H7N9) Virus, China, 2013-2014*.  
554 Emerging Infectious Diseases, 2015. **21**(5): p. 852-855.
- 555 27. Yuan, J., et al., *Enhanced Disinfection and Regular Closure of Wet Markets Reduced the Risk of*  
556 *Avian Influenza A Virus Transmission*. Clinical Infectious Diseases, 2014. **58**(7): p. 1037-1038.
- 557 28. Shaman, J. and M. Kohn, *Absolute humidity modulates influenza survival, transmission, and*  
558 *seasonality*. Proceedings of the National Academy of Sciences of the United States of America,  
559 2009. **106**(9): p. 3243-3248.
- 560 29. Shaman, J., et al., *Absolute Humidity and the Seasonal Onset of Influenza in the Continental*  
561 *United States*. PLOS Biology, 2010. **8**(2).
- 562 30. Liu, T., et al., *Independent and interactive effects of ambient temperature and absolute*  
563 *humidity on the risks of avian influenza A(H7N9) infection in China*. Science of The Total  
564 Environment, 2018(619-620): p. 1358-1365.
- 565 31. Breban, R., et al., *The Role of Environmental Transmission in Recurrent Avian Influenza*  
566 *Epidemics*. PLOS Computational Biology, 2009. **5**(4).
- 567 32. Zhang, J., et al., *Determination of original infection source of H7N9 avian influenza by*  
568 *dynamical model*. Scientific Reports, 2014. **4**(6183): p. 4846.
- 569 33. Xing, Y., et al., *Assessing reappearance factors of H7N9 avian influenza in China*. Applied  
570 Mathematics & Computation, 2017. **309**: p. 192-204.
- 571 34. Lin, Q., et al., *Seasonality of Influenza A(H7N9) Virus in China-Fitting Simple Epidemic Models*  
572 *to Human Cases*. PLOS ONE, 2016. **11**(3).
- 573 35. He, D., et al., *Inferring the causes of the three waves of the 1918 influenza pandemic in*  
574 *England and Wales*. Proceedings of The Royal Society B: Biological Sciences, 2013. **280**(1766):  
575 p. 20131345-20131345.
- 576 36. Brooks, S., et al., *Handbook of Markov Chain Monte Carlo*. 2011: New York: Chapman and  
577 Hall/CRC.
- 578 37. Haario, H., et al., *DRAM: Efficient adaptive MCMC*. Statistics & Computing, 2006. **16**(4): p.  
579 339-354.
- 580 38. Marino, S., et al., *A Methodology For Performing Global Uncertainty And Sensitivity Analysis*  
581 *In Systems Biology*. Journal of Theoretical Biology, 2008. **254**(1): p. 178-196.
- 582 39. Kung, N.Y., et al., *The Impact of a Monthly Rest Day on Avian Influenza Virus Isolation Rates in*  
583 *Retail Live Poultry Markets in Hong Kong*. Avian Diseases, 2003. **47**(3): p. 1037-1041.

- 584 40. Leung, Y.H.C., et al., *Avian Influenza and Ban on Overnight Poultry Storage in Live Poultry*  
585 *Markets, Hong Kong*. Emerging Infectious Diseases, 2012. **18**(8): p. 1339-1341.
- 586 41. Shi, B., et al., *Inferring the potential risks of H7N9 infection by spatiotemporally characterizing*  
587 *bird migration and poultry distribution in eastern China*. Infectious Diseases of Poverty, 2013.  
588 **2**(1): p. 8-8.

589
